1 **Title:** State-Unspecific Modes of Whole-Brain Functional Connectivity Predict Intelligence  
2 and Life Outcomes

3

4 **Authors and author addresses:**

5 Yu Takagi<sup>1,2,3\*</sup>, Jun-ichiro Hirayama<sup>4,1</sup>, Saori C Tanaka<sup>1\*</sup>

6 <sup>1</sup> ATR Brain Information Communication Research Laboratory Group, Kyoto 619-0288,  
7 Japan

8 <sup>2</sup> Graduate School of Information Science, Nara Institute of Science and Technology, Nara  
9 630-0192, Japan.

10 <sup>3</sup> Japan Society for the Promotion of Science, Tokyo 102-0083, Japan

11 <sup>4</sup> RIKEN Center for Advanced Intelligence Project, Tokyo 103-0027, Japan.

12 **\*Corresponding author:** [yu.takagi@atr.jp](mailto:yu.takagi@atr.jp) (Yu Takagi), [xsaori@atr.jp](mailto:xsaori@atr.jp) (Saori C. Tanaka)

13 **Conflict of Interest:** The authors declare no competing financial interests.

14

15 **Abstract**

16 Recent functional magnetic resonance imaging (fMRI) studies have increasingly revealed  
17 potential neural substrates of individual differences in diverse types of brain function and  
18 dysfunction. Although most previous studies have been inherently limited to state-specific  
19 characterizations of related brain networks and their functions, several recent studies have  
20 examined the potential state-unspecific nature of functional brain networks, such as their  
21 global similarities across different experimental conditions (i.e., states) including both task  
22 and rest. However, no previous studies have carried out direct, systematic characterizations  
23 of state-unspecific brain networks, or their functional implications. Here, we quantitatively  
24 identified several modes of state-unspecific individual variation in whole-brain functional  
25 connectivity patterns, called “Common Neural Modes (CNMs)”, from a large fMRI dataset  
26 including eight task/rest states, obtained from the Human Connectome Project. Furthermore,  
27 we tested how CNMs account for variability in individual behavioral measures. The results  
28 revealed that three CNMs were robustly extracted under various different preprocessing  
29 conditions. Each of these CNMs was significantly correlated with different aspects of  
30 behavioral measures of both fluid and crystalized intelligence. The three CNMs were also  
31 able to predict several life outcomes, such as income and life satisfaction, achieving the  
32 highest performance when combined with behavioral intelligence measures as inputs. Our  
33 findings highlight the importance of state-unspecific brain networks to characterize  
34 fundamental individual variation.

35

36 **Keywords**

37 Functional connectivity fMRI, Machine learning, Human Connectome Project, Intelligence

38

## 39 **Introduction**

40

41 An increasing number of cognitive neuroscience studies have revealed the neural substrates  
42 of individual difference using functional magnetic resonance imaging (fMRI) (Dubois and  
43 Adolphs, 2016) by investigating coordinated activation (co-activation) patterns of the whole  
44 brain. The degree of co-activation between different brain regions of interest (ROIs), often  
45 referred to as functional connectivity (FC), is typically measured by the correlation between  
46 the blood-oxygen-level-dependent (BOLD) signals averaged within each ROI. A set of brain  
47 regions that cooperates under some experimental conditions is typically called a “network”,  
48 as represented by the default mode network (DMN) (Raichle, 2015). A wide variety of  
49 individual differences in our cognition and behavior have been associated with the  
50 characteristics of FC patterns and networks in the brain, including cognitive abilities (Finn et  
51 al., 2015; Smith et al., 2015), sustained attention ability (Rosenberg et al., 2016), emotional  
52 sensitivity (Modi et al., 2015; Takagi et al., 2018) and psychiatric disorders (Fox and Greicius,  
53 2010; Takagi et al., 2017).

54

55 These previous studies have investigated the relationship between individual differences and  
56 brain networks while a person is experiencing a specific state. In particular, recent research  
57 has intensively focused on the resting state, as it potentially reflects many types of individual  
58 differences and can be measured easily (Dubois and Adolphs, 2016). The present study is  
59 directly inspired by Smith et al. (2015), who revealed, in a data-driven manner, that a small  
60 number of linear factors underlying individuals’ whole-brain resting-state FC patterns  
61 (“neural modes”) can explain diverse ranges of individual differences simultaneously (Smith  
62 et al., 2015). However, despite their apparent connections with behavior, the brain networks  
63 and neural modes examined in these previous studies, as well as their relations to individual  
64 differences, are inherently state-specific; thus, it is unclear whether these findings generalize  
65 across states, indicating basic traits of individuals. Geerligs et al. (2015) demonstrated that  
66 the relationship between individual differences and FC patterns may substantially change  
67 across different states, including both rest and task (Geerligs et al., 2015).

68

69 A small number of recent studies have suggested the existence of more fundamental, “state-  
70 unspecific” brain networks which characterize individuals in a similar manner across  
71 different states (Cole et al., 2014; Finn et al., 2015; Tavor et al., 2016). Specifically, Cole et  
72 al. (2014) found that average FC patterns of a number of subjects exhibit a high degree of  
73 global similarity among different states, including rest. Finn et al. (2015) reported that FC  
74 patterns of each individual were also globally similar, across various task and rest states.  
75 Furthermore, Tavor et al. (2016) revealed that an individual’s brain activity during a task state  
76 can be predicted from their resting-state FC patterns. These findings clearly suggest a  
77 potential state-unspecific aspect of brain networks. Unfortunately, however, no previous  
78 studies have explicitly identified these state-unspecific brain networks, or quantitatively  
79 investigated their relationship to individual differences in behavior.

80

81 In the present study, we conducted, for the first time, a quantitative characterization of state-  
82 unspecific brain networks and investigated its connection with inter-individual variability in  
83 behavior. Our approach combined the large-scale database of the Human Connectome Project  
84 with a sophisticated machine learning technique. Specifically, we applied multiset canonical  
85 correlation analysis (M-CCA) to the FC matrices obtained from eight states, including the  
86 resting state (Kettenring, 1971; Via et al., 2007). The obtained components uniquely  
87 characterize individuals’ FC patterns that are common across different states, which we refer  
88 to as “Common Neural Modes (CNMs)”. We demonstrated that several CNMs could be  
89 robustly extracted from whole-brain FC patterns. These CNMs were then found to be  
90 selectively correlated with behavioral intelligence measures. In addition, we demonstrated  
91 that CNMs could predict several types of life outcomes, complementing conventional  
92 behavioral measures of intelligence.

93 **Materials and methods**

94

95 **Subjects**

96 We used a public fMRI dataset available from the Human Connectome Project (HCP) 500  
97 Subject Release (Van Essen et al., 2012) (<http://humanconnectome.org/data>). We excluded  
98 1) subjects who did not have all eight fMRI datasets (corresponding to seven task states and  
99 one resting state) or who were not given all 44 behavioral measures (subdivided into 12  
100 categories of cognition), and 2) subjects who exhibited substantial movement during fMRI  
101 data acquisition (see fMRI preprocessing). After this screening process, 406 subjects were  
102 included in the final analysis. All subjects were healthy adults (ages 22–36 years, 238  
103 females).

104

105 **MRI parameters**

106 The fMRI data were acquired using a protocol with advanced multiband sequences. Whole-  
107 brain echo-planar scans were acquired with a 32-channel head coil on a modified 3T Siemens  
108 Skyra with repetition time = 720 ms, echo time = 33.1 ms, flip angle = 52°, bandwidth 2,290  
109 Hz/Px, in-plane field of view = 208 × 180 mm, 72 slices, 2.0 mm isotropic voxels, with a  
110 multiband acceleration factor of 8 (Uğurbil et al., 2013). Data were collected over 2 days. On  
111 each day, 28 min of rest (eyes open with fixation) fMRI data across two runs were collected  
112 (two runs, 56 min in total, per day), followed by 30 min of task-fMRI data collection (60 min  
113 in total, per day). Each of the seven task-fMRI was completed over two consecutive fMRI  
114 runs. Three task-fMRI (working memory, reward learning, and motor responses) data were  
115 collected on the first day. The other four task-fMRI (emotion perception, language processing,  
116 relational reasoning, and social cognition) data were collected on the second day. More  
117 details about the fMRI collection method were described in previous studies (Barch et al.,  
118 2013; Smith et al., 2013).

119

120 **Task paradigms**

121 The seven task-fMRI paradigms were selected to activate different neural circuitry that  
122 supports broad cognitive functions, and included emotion perception, reward learning,

123 language processing, motor responses, relational reasoning, social cognition, and working  
124 memory (Barch et al., 2013; Cole et al., 2016). Briefly, the emotion task involved matching  
125 fearful or angry faces to a target face. The reward learning task involved a gambling task  
126 involving monetary rewards and losses. The language task involved auditory stimuli  
127 consisting of narrative stories and math problems, along with questions to be answered  
128 regarding the prior auditory stimuli. The motor task involved movement of the hands, tongue  
129 and feet. The relational reasoning task involved higher-order cognitive reasoning regarding  
130 relations among features of presented shape stimuli. The social cognition (theory of mind)  
131 task used short video clips of moving shapes that interacted in some way or moved randomly,  
132 with subjects making decisions about whether the shapes had social interactions. The  
133 working memory task involved the conventional visual 2-back and 0-back tasks.

134

### 135 **fMRI preprocessing**

136 Fig. 1 shows a schematic diagram of our analysis. The datasets were originally preprocessed  
137 through the HCP minimal preprocessing pipeline (Glasser et al., 2013). This pipeline includes  
138 artefact removal, motion correction and registration to standard space. T1 images were  
139 segmented into three tissue classes in Montreal Neurological Institute (MNI) space using  
140 Statistical Parametric Mapping 8 (SPM8: Wellcome Department of Cognitive Neurology,  
141 <http://www.fil.ion.ucl.ac.uk/spm/software/>) in MATLAB (The MathWorks, Inc., Natick,  
142 MA). First, for each subject, the framewise displacement (FD) at each scan was calculated  
143 by summing up all six head motion parameters. The “scrubbing” procedure (Power et al.,  
144 2012) then identified scans that exhibited excessive head motion based on FD volumes.  
145 Specifically, a scan was flagged if the FD exceeded 0.5 mm. The flagged scan, the preceding  
146 scan, and the two subsequent scans, were excluded from the correlation analysis below.  
147 Subjects were excluded from the subsequent analyses if less than 50% of the scans remained  
148 after this procedure for any of the eight fMRI data sets. Then, for each subject, pair-wise,  
149 interregional FC was evaluated among 268 ROIs covering the entire brain (Finn et al., 2015)  
150 (atlas can be downloaded from [https://www.nitrc.org/frs/?group\\_id=51](https://www.nitrc.org/frs/?group_id=51)). The representative  
151 time course of each region was extracted by averaging the BOLD time courses of the voxels  
152 within that region. Each ROI time course was linearly regressed on the temporal fluctuations

153 of both the white matter and the cerebrospinal fluid as well as the six head motion parameters,  
 154 whose effects were then subtracted from the original time course. The fluctuation of each  
 155 tissue class was the average time course of the voxels within the corresponding mask. After  
 156 within-run linear trend removal, for each subject, we calculated an FC matrix consisting of  
 157 all the pairwise FCs between the 268 ROIs, based only on the remaining scans after the  
 158 scrubbing step above. As the FC matrices are symmetric, values on only the strictly lower  
 159 part were kept, resulting in 35,778 ( $= 268 \times 267 / 2$ ) unique entries (FC values) (Fig. 1a). For  
 160 all task and resting state fMRI data, FC matrices were calculated using the same procedure.  
 161 Note that an FC matrix was obtained for every run, and those of multiple runs were averaged  
 162 in each of the eight task or resting-state conditions.

163

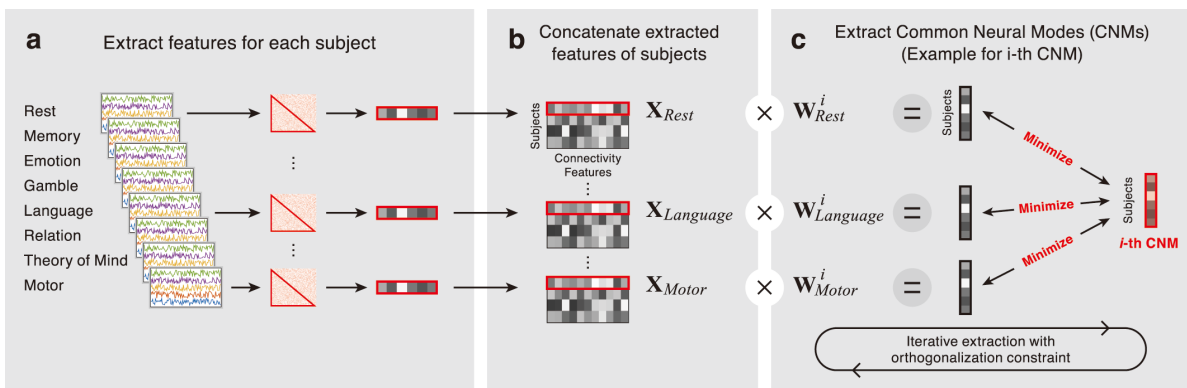

164

165 **Figure 1. Schematic diagram of the analyses. (1)** For each subject, feature vectors from  
 166 the eight states were extracted. (2) Within each state, data for all subjects were  
 167 concatenated to obtain input data matrices. (3) Common Neural Modes (CNMs) were  
 168 calculated by minimizing the difference between weighted input matrices and CNMs.  
 169 CNMs were iteratively calculated with the orthogonalization constraint.

170

171

## 172 Identifying CNMs

173 We identified common neural modes (CNMs) of individuals as FC patterns that robustly  
 174 characterized individuals irrespective of state. Specifically, we used M-CCA (Kettenring,  
 175 1971), which extends canonical correlation analysis (CCA) (Hotelling, 1936) to more than

176 two datasets. Both methods identify canonical variates that summarize each dataset by linear  
177 transformations. In contrast, conventional CCA maximizes correlations between a pair of  
178 canonical variates, M-CCA maximizes a scalar objective function that summarizes all  
179 pairwise correlations among  $M (> 2)$  canonical variates. M-CCA reduces to CCA when the  
180 number of datasets  $M$  is two. Several variants of M-CCA have been proposed, depending on  
181 how it summarizes the pairwise correlations into a single objective function (Kettenring,  
182 1971). We chose the MAXVAR approach because it explicitly introduces common latent  
183 factors across different datasets (Vía et al., 2007), which can be naturally interpreted as  
184 CNMs.

185 Suppose that we are given  $M$  data matrices  $\mathbf{X}_k \in \mathbb{R}^{N \times m_k}$ ,  $k = 1, \dots, M$  (Fig. 1b), where  $N$   
186 denotes the sample size and  $m_k$  denotes the dimensionality of the  $k$ -th data space. Each  
187 column is assumed to have zero sample mean, without loss of generality. The MAXVAR  
188 approach can then be stated as the problem of finding  $M$  weight vectors  $\mathbf{w}_k$  ( $k = 1, \dots, M$ ), each  
189 for one of the  $M$  datasets, so that the errors between the corresponding canonical factors  $\mathbf{X}_k \mathbf{w}_k$   
190 and their grand average  $\mathbf{z} \in \mathbb{R}^{N \times 1}$  is minimized. The cost function to be minimized is  
191 formally given as

$$192 \quad J = \min \sum_{k=1}^M \|\mathbf{z} - \mathbf{X}_k \mathbf{w}_k\|^2.$$

193 where the minimization is performed with respect to both  $\mathbf{w}_k$  and  $\mathbf{z}$ . To avoid trivial solutions,  
194  $\mathbf{w}_k$  and  $\mathbf{z}_k$  are constrained to have unit Euclidean norms, and to be mutually orthogonal. The  
195 solution is given by solving a generalized eigenvalue problem. See Via et al. (2005) for more  
196 detailed information about this procedure. Solving this problem gives a set of  $M$  vectors  $\mathbf{w}_k$ ,  
197 and CNMs are defined as the average of  $\mathbf{X}_k \mathbf{w}_k$  for  $k = 1, \dots, M$  (Fig. 1c).

198 To reduce redundancy among FCs, the dimensionalities of the data matrices were reduced in  
199 advance using principal components analysis (PCA). The numbers of principal components  
200 were varied between 10, 50 and 100 for calculating CNMs, and the numbers of CNMs were  
201 also varied between 10, 50 and 100, respectively. The significance of the pairwise canonical  
202 correlations was investigated using a permutation test for individual CNMs. We first shuffled  
203 subject labels of all  $\mathbf{X}_k$ , then conducted M-CCA. We ran these analyses 1,000 times and



204 obtained 1,000 instances of estimated  $\mathbf{w}_k$ . We then took the average of the absolute correlation  
205 coefficients between all pairs among  $\mathbf{X}_k\mathbf{w}_k$  for each random dataset. Finally, we calculated  
206 the statistical significance by comparing the true averaged value of the correlation coefficient  
207 with those obtained from shuffled datasets.

208

### 209 **Relationship between CNMs and cognitive measures**

210 To analyze how CNMs were associated with individual differences in behavior, we calculated  
211 Pearson's correlations between the CNMs and cognitive measures obtained using HCP with  
212 various behavioral test batteries. The targets of those cognitive measures include, for example,  
213 episodic memory, executive function, self-regulation, language and fluid intelligence. The  
214 original set of measures were available from the HCP database website. When both age-  
215 adjusted and age-unadjusted versions existed for the same index, we excluded the age-  
216 unadjusted version.

217 To reduce the risk of overfitting, we conducted all analyses in a fully cross-validated manner  
218 (Barch and Yarkoni, 2013). Specifically, we first split all the subjects into 10 disjointed  
219 subsets of subjects. The model for calculating CNMs was then obtained based on all but one  
220 set of subjects (training set) and the model was then tested on the one withheld set of subjects  
221 (test set). We repeated this procedure 10 times (10-fold cross validation).

222

### 223 **Prediction of life outcomes using CNMs**

224 The preceding analysis suggested that CNMs correlated with representative intelligence  
225 measures obtained by the behavioral test batteries. Thus we further investigated whether the  
226 CNMs may account for individual differences in the subjects' life outcomes, which have been  
227 considered to be predicted by intelligence measures in the field of educational psychology  
228 (Cattell, 1963; Colom et al., 2010; Gottfredson, 1997). As a measure of life outcomes, we  
229 chose three measures: income, life satisfaction and year of education. We conducted the  
230 analysis using nested 10-fold cross validation. We first split all subjects into 10 sets of  
231 subjects, and identified CNMs based on the training set, as with the previous analysis. We  
232 then constructed a prediction model using 5-fold cross validation among the training set. We  
233 used the L1-regularized linear regression model for each iteration. The hyper-parameter  $\lambda$

234 (the regularization coefficient) was tuned by choosing the best value from  $\lambda \in$   
235  $\{0.0001, 0.001, 0.01, 0.1\}$  based on this inner 5-fold cross validation. We finally applied the  
236 models for calculating CNMs and life outcomes to the test set. Performance was evaluated  
237 by performing Pearson's correlation between predicted and actual life outcomes across whole  
238 subjects.

239

#### 240 **Effects of the number of states used to identify CNMs**

241 We investigated the effects of the number of states used to identify CNMs on prediction  
242 accuracy. Specifically, we conducted the same prediction analyses as above, but here we used  
243 a smaller number of states for constructing the CNMs. We varied the number of states for  
244 constructing the CNMs from 2 to 8. We calculated all possible combinations for each case.

245 For example, we calculated 28 CNMs ( $=\binom{8}{2}$ ), then constructed prediction models for all

246 CNMs, when we estimated the prediction accuracy of two states.

247

#### 248 **Interpretation of CNMs**

249 To facilitate the characterization of the biological substrates of the CNMs, we summarized  
250 the FC patterns that were correlated with first, second and third CNMs. We focused on these  
251 three CNMs because they had been robustly extracted by M-CCA. First, we averaged every  
252 FC value over all eight states. We then calculated Pearson's correlation coefficients between  
253 three CNMs and each averaged FC. The 268 ROIs were then grouped into eight  
254 representative macroscale networks (e.g., DMN) defined functionally in a previous study  
255 (Finn et al., 2015). We then examined the number of FCs between each pair of regions in  
256 each network. Finally, we visualized the relative numbers of FCs in each of the two networks  
257 as the thickness of the connection lines (see Fig. 5). To aid interpretation, we visualized 200  
258 FCs among all 38,578 FCs that were the most strongly correlated with the CNMs.

259

260 **Results**

261

262 **Characterization of CNMs**

263 We first determined the number of CNMs that exhibited significant pairwise canonical  
264 correlations among eight states. For any choices of the preprocessing PCA dimensions (i.e.,  
265 10, 50, and 100), first, second and third CNMs (namely CNM1, CNM2 and CNM3) exhibited  
266 significant overall correlations between states (where all the pairwise correlations were  
267 averaged) ( $P < 0.001$  for all CNMs; 1,000 times permutation test); the other CNMs did not  
268 ( $P > 0.05$ ; 1,000 times permutation test). The M-CCA results were highly consistent under  
269 different choices of PCA dimensions (see Supplementary Notes). We therefore focused on  
270 the top three CNMs, obtained by M-CCA on 10 PCs of FC vectors.

271 We then investigated which cognitive measures correlated with each of the three CNMs. Figs.  
272 2a, 2b and 2c show the distributions of the correlation coefficients between cognitive  
273 measures and CNM1, CNM2 and CNM3, respectively. Table 1 shows representative  
274 behavioral indices with significantly higher correlation coefficients than the chance level.  
275 CNM1 was selectively correlated with fluid intelligence, which is a representative  
276 component of general intelligence having a broad effect on our daily life and future success  
277 (Cattell, 1963; Colom et al., 2010; Gottfredson, 1997). CNM2 correlated with various  
278 language related scores (reading recognition and vocabulary comprehension) and self-  
279 regulation (delay discounting). It is noteworthy that language related scores are related to  
280 crystalized intelligence, a central component of general intelligence along with fluid  
281 intelligence (Cattell, 1963; Gottfredson, 1997). Finally, CNM3 was correlated with both fluid  
282 intelligence and language-related scores. Note that we confirmed that the correlations  
283 described above were not simply the consequence of PCA, which maximizes the variability  
284 between individuals in each state (see Supplementary Notes).

285

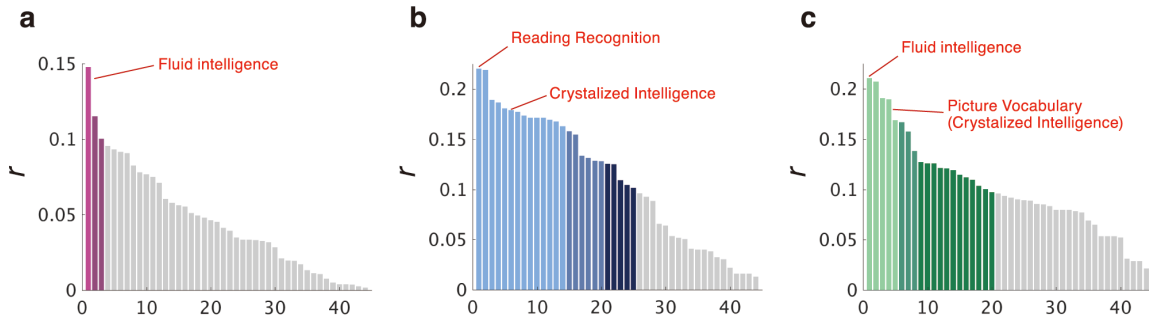

286

287

288

289

290

291

292

**Figure 2. Absolute correlation coefficients (r) between each cognitive measure and the CNMs.** Absolute correlation coefficients (r) between 44 cognitive measures and (a) CNM1, (b) CNM2 and (c) CNM3, respectively. The bar with light, medium, dark colored and grey indicated different levels of significance ( $P < 0.001$ ,  $P < 0.01$ ,  $P < 0.05$  and  $P \geq 0.05$ , respectively).

| CNM1                                                                   |       | CNM2                                                                |       | CNM3                                                                     |       |
|------------------------------------------------------------------------|-------|---------------------------------------------------------------------|-------|--------------------------------------------------------------------------|-------|
| Name                                                                   | R     | Name                                                                | R     | Name                                                                     | R     |
| Penn Progressive Matrices: Number of Correct Responses                 | 0.148 | NIH Toolbox Oral Reading Recognition Test: Age-Adjusted Scale Score | 0.221 | Penn Progressive Matrices: Number of Correct Responses                   | 0.211 |
| Penn Progressive Matrices: Total Skipped Items                         | 0.115 | Delay Discounting: Subjective Value for \$200 at 1 year             | 0.219 | Penn Progressive Matrices: Total Skipped Items                           | 0.207 |
| Penn Emotion Recognition Test: Number of Correct Happy Identifications | 0.100 | Delay Discounting: Area Under the Curve for Discounting of \$40,000 | 0.189 | Variable Short Penn Line Orientation: Total Positions Off for All Trials | 0.191 |

|  |                                                                  |       |                                                                                |       |
|--|------------------------------------------------------------------|-------|--------------------------------------------------------------------------------|-------|
|  | Delay Discounting: Subjective Value for \$40K at 5 years         | 0.187 | NIH Toolbox Picture Vocabulary Test: Age-Adjusted Scale Score                  | 0.189 |
|  | Delay Discounting: Subjective Value for \$200 at 6 months        | 0.181 | Delay Discounting: Subjective Value for \$40K at 1 year                        | 0.169 |
|  | NIH Toolbox Picture Vocabulary Test: Age-Adjusted Scale Score    | 0.179 | Variable Short Penn Line Orientation: Total Number Correct                     | 0.167 |
|  | Delay Discounting: Area Under the Curve for Discounting of \$200 | 0.178 | Penn Emotion Recognition Test: Number of Correct Responses                     | 0.157 |
|  | Delay Discounting: Subjective Value for \$200 at 3 years         | 0.174 | Penn Emotion Recognition Test: Number of Correct Sad Identifications           | 0.138 |
|  | Short Penn Continuous Performance Test: Specificity              | 0.172 | NIH Toolbox Pattern Comparison Processing Speed Test: Age-Adjusted Scale Score | 0.127 |
|  | Short Penn Continuous Performance Test: True Negatives           | 0.172 | Delay Discounting: Area Under the Curve for Discounting of \$40,000            | 0.126 |

293

294

**Table 1. Cognitive measures that were highly significantly correlated with CNMs**

295

## 296 **Prediction of life outcomes using CNMs**

297 We next investigated whether CNMs could predict life outcomes, complementing  
298 conventional behavioral tests (i.e., measures of fluid intelligence).

299 Figs. 3a, 3b and 3c show that predicting with CNMs alone achieved significant predictive  
300 value ( $P < 10^{-4}$  for income and number of years of education;  $P < 2.00 \times 10^{-4}$  for life  
301 satisfaction; 10,000 times permutation test). The correlation coefficient ( $r$ ) was slightly  
302 higher than that with fluid intelligence alone for income and life satisfaction, but worse for  
303 years of education. Combining both the CNMs and fluid intelligence yielded the highest  
304 performance in every case ( $P < 10^{-4}$  for all income and years of education;  $P < 2.00 \times 10^{-4}$   
305 for life satisfaction; 10,000 times permutation test).

306

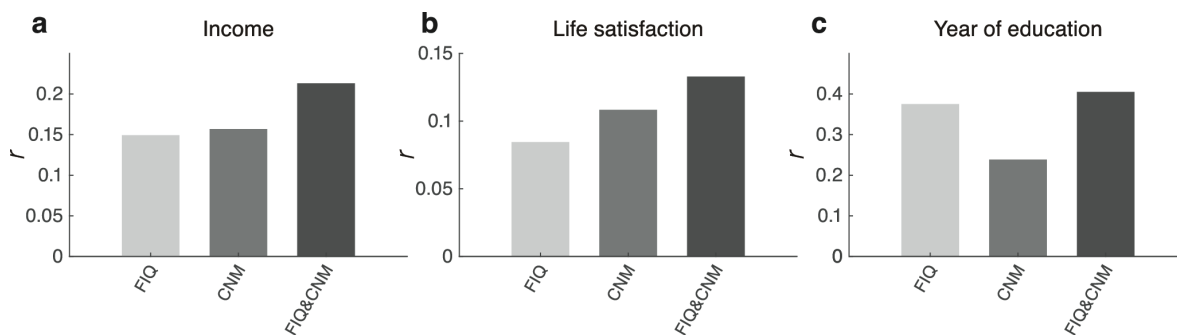

307

308 **Figure 3. Prediction performance.** Cross validated prediction accuracies by the fluid  
309 intelligence obtained by the behavioral test batteries (FIQ; left), the CNMs (middle) and  
310 their combination (right) for income, life satisfaction and number of years of education,  
311 respectively.

312

## 313 **Effects of the number of states used for the CNMs**

314 We further investigated the effects of the number of states used for identifying the CNMs on  
315 the prediction accuracy. Fig. 4a, 4b and 4c show the prediction accuracies using the CNMs  
316 with different numbers of states. These figures indicate that the more states we used, the  
317 greater accuracy we were able to achieve for predicting life outcomes. We constructed linear  
318 regression models, and found that the effects of the number of states were significant for all

319 models ( $P = 8.15 \times 10^{-13}$  for income;  $P = 5.71 \times 10^{-13}$  for life satisfaction;  $P = 0.007$  for years  
320 of education).

321

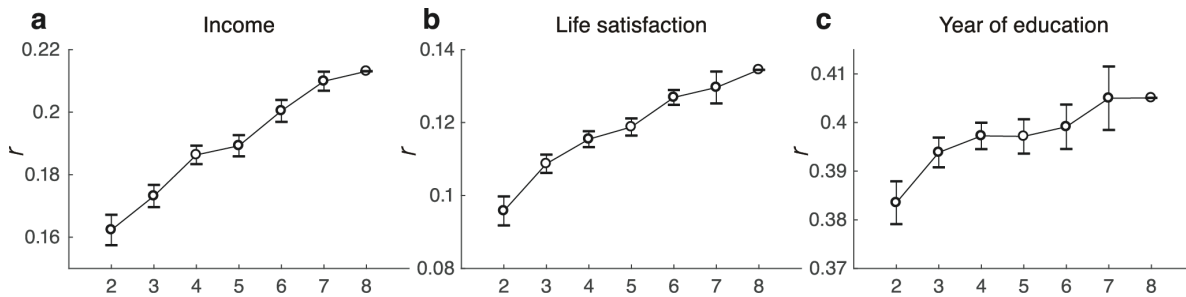

322

323 **Figure 4. Relationship between the number of states used for the CNMs and**  
324 **prediction performance.** Cross validated prediction accuracies of the CNMs obtained  
325 from different numbers of states for income (left), life satisfaction (middle) and number  
326 of years of education (right), respectively.

327

### 328 Interpretation of the CNMs

329 To facilitate characterization of the biological substrates of the FCs underlying CNMs, we  
330 grouped the 268 ROIs into eight macroscale canonical networks. Figure 5 show the circle  
331 plots of the FCs that were correlated with CNM1, CNM2 and CNM3. The numbers of FCs  
332 in each of the two macroscale regions (the medial frontal [MF], frontoparietal [FP], default  
333 mode network [DMN], subcortical-cerebellum [SC-CB], motor [MTR], visual I [V1], visual  
334 II [V2], and visual association [VAssc]) networks are presented as the thickness of the  
335 connection lines. Connection lines are colored blue within the same network and red between  
336 two networks. Although the FCs were widely distributed rather than locally constrained,  
337 there were some differences in the distributions among the CNMs. A certain degree of the  
338 FCs in the CNM1 belonged to the networks between cortical and subcortical brain regions,  
339 including the medial frontal network. On the other hand, FCs in the CNM2 belonged to the  
340 networks within cortical brain regions including the frontoparietal network. Finally, FCs in  
341 the CNM3 belonged to both the cortico-cortico and cortico-subcortical networks including  
342 both the medial frontal and frontoparietal networks.

343

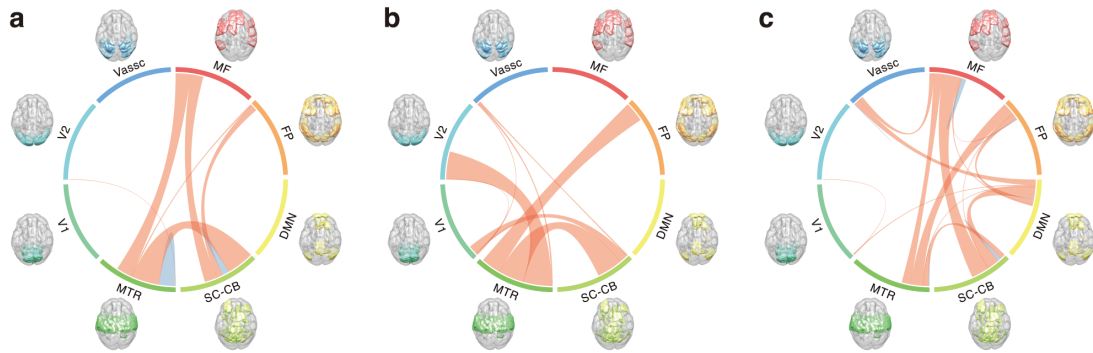

344

345

**Figure 5. Spatial distribution of the functional connectivity (FC) related to CNMs.**

346

The number of FCs between each pair of canonical networks in **(1)** CNM1, **(2)** CNM2 and

347

**(3)** CNM3, respectively. Canonical networks included the medial frontal (MF),

348

frontoparietal (FP), default mode network (DMN), subcortical-cerebellum (SC-CB),

349

motor (MTR), visual I (V1), visual II (V2), and visual association (VAssc). Connection

350

lines are colored blue within the same network and red between two networks.

351



## 352 **Discussion**

353

354 In the present study, we conducted, for the first time, a quantitative examination of the  
355 potential factors underlying state-unspecific inter-individual variability of whole-brain FC  
356 patterns, which we termed CNMs, and investigated their associations with behaviors and life  
357 outcomes. Although previous studies have suggested a state-unspecific pattern of FC (Cole  
358 et al., 2014; Finn et al., 2015; Tavor et al., 2016), to our knowledge no study has directly  
359 defined such FC patterns in a quantitative manner. The CNMs were extracted by M-CCA in  
360 a fully cross-validated manner from the fMRI datasets of the HCP, covering a broad range of  
361 task and resting states. The CNMs predicted representative intelligence measures including  
362 fluid and crystallized intelligence with significant correlations, which could not be achieved  
363 without M-CCA (i.e., with PCA alone). We further demonstrated that the CNMs were able to  
364 predict several life outcomes, complementing conventional behavioral tests of fluid  
365 intelligence. We also found that the more states we used to identify CNMs, the higher  
366 accuracy we were able to achieve when predicting life outcomes. The FCs constituting those  
367 CNMs were widely distributed throughout the brain rather than being locally constrained.

368

369 Three CNMs were robustly extracted by M-CCA, which correlated significantly with  
370 representative intelligence measures (Fig. 2). Intelligence measures are related to a wide  
371 range of cognitive functions and predict broad social outcomes such as educational  
372 achievement, job performance, health, and longevity (Cattell, 1963; Colom et al., 2010;  
373 Gottfredson, 1997). Therefore, the relationships between the CNMs and these measures are  
374 intuitive to understand. It is also noteworthy that each CNM correlated with a different  
375 dimension of intelligence. That is, CNM1 and CNM3 correlated with fluid intelligence, while  
376 the CNM2 correlated with crystallized intelligence. This suggests that these CNMs may have  
377 different biological substrates (Fig. 5). Importantly, the CNMs were derived in a fully data-  
378 driven, cross-validated manner. The relationship between CNMs and intelligence measures  
379 was thus non-trivial. Although our study was inspired by the “positive-negative” neural  
380 modes (Smith et al., 2015) which are also correlated with intelligence measures, our CNM  
381 analysis fundamentally differs from that used by Smith et al. (2015) in several important

382 ways. First, although Smith et al. (2015) obtained their results by optimizing the correlation  
383 between behavioral measures and FCs explicitly, our CNM did not use any behavioral  
384 measure. Second, while Smith et al. (2015) used resting state data only, our CNM method  
385 used multiple states.

386

387 When predicting life outcomes from CNMs alone, CNMs achieved higher prediction  
388 accuracies for income and life satisfaction than prediction with conventional intelligence  
389 measures alone. In contrast, conventional intelligence measures achieved better prediction  
390 for the number of years of education (Fig. 3). These results may reflect different  
391 characteristics between biologically defined measures and measures from a behavioral  
392 battery. It should be noted that combining the CNMs with fluid intelligence achieved the  
393 highest prediction accuracies for all life outcomes. These results indicate that CNMs contain  
394 valuable information for predicting behavior that may not be captured by conventional  
395 intelligence measures.

396

397 Importantly, using a greater number of states to identify CNMs enabled us to achieve greater  
398 prediction accuracy (Fig. 4). This indicates that CNMs were more reliably extracted when  
399 considering a greater number of behavioral states. Indeed, the correlation between  
400 representative intelligence measures and first principal components derived from each single  
401 state were lower than those of the CNMs. Our findings suggest that contrasting many  
402 different states, rather than considering any single (typically resting) state, can more reliably  
403 identify the neural modes that are able to predict diverse types of individual differences.

404

405 Although all three CNMs were related to the subcortical-networks and motor networks, we  
406 observed different trends among them in terms of the related canonical networks (Fig. 5).  
407 CNM1, CNM2 and CNM3 were related to the medial frontal network, frontoparietal network,  
408 and both networks, respectively. This finding is of interest because CNM1 and CNM2  
409 captured different aspects of intelligence (fluid and crystalized intelligence, respectively)  
410 while CNM3 was related to both. We also observed that brain regions contributing to all  
411 CNMs were widely distributed rather than locally restricted. This is consistent with a

412 previous study reporting that brain regions related to intelligence were broadly distributed  
413 (Haier et al., 2009). Several previous studies have also reported a relationship between  
414 intelligence measures and FCs (Finn et al., 2015; Lerman-Sinkoff et al., 2017; Schultz and  
415 Cole, 2016). However, most of these studies have examined only one state.

416

417 Although we focused on state-unspecific neural modes across various states, these modes  
418 would be expected to function in a coordinated way with other state-specific neural modes  
419 in any particular state. Different neural modes for respective states may have different  
420 abilities associated with different neural substrates, which may also cause individual  
421 differences in behavior. Thus, it would be useful for future studies to comprehensively  
422 compare the relationship between the state-specific and state-unspecific neural modes in  
423 terms of their relationship with both cognitive measures and neural substrates.

424

425 In summary, we identified neural modes that appeared to be stable across different states, and  
426 quantitatively characterized various individual differences. These components, referred to as  
427 CNMs, were identified in a fully data-driven manner using a machine learning technique.  
428 The CNMs were significantly correlated with representative intelligence measures as well as  
429 life outcomes. Although previous studies suggested the potential of brain networks that are  
430 shared among broad states, the current study is the first to quantitatively define such networks  
431 and demonstrate that they may have a broad effect on behavior and life outcomes. We believe  
432 that the present study provides evidence that state-unspecific brain networks may be related  
433 to a diverse range of behaviors and life achievements.

434

435 **Acknowledgements:** This study is the result of “Development of BMI Technologies for  
436 Clinical Application” carried out under the Strategic Research Program for Brain Sciences  
437 by the MEXT, Japan. JH was supported by KAKENHI 17H06041 from Japan Society for the  
438 Promotion of Science (JSPS). We thank Hiroshi Imamizu, Ph.D., Masahiro Yamashita, Ph.D.,  
439 Ryu Ohata, Ph.D., for helpful discussions and proofreading the manuscript. We thank  
440 Mitsuo Kawato, Ph.D., Kazuo Shigemasa, Ph.D., Okito Yamashita, Ph.D., and Ayumu  
441 Yamashita for helpful discussions. We thank Nobuyuki Izumihara for his support for

442 visualization.

443

444 **References**

445

- 446 Barch, D.M., Burgess, G.C., Harms, M.P., Petersen, S.E., Schlaggar, B.L., Corbetta, M.,  
447 Glasser, M.F., Curtiss, S., Dixit, S., Feldt, C., Nolan, D., Bryant, E., Hartley, T.,  
448 Footer, O., Bjork, J.M., Poldrack, R., Smith, S., Johansen-Berg, H., Snyder, A.Z., Van  
449 Essen, D.C., 2013. Function in the human connectome: Task-fMRI and individual  
450 differences in behavior. *Neuroimage* 80, 169–189.  
451 doi:10.1016/j.neuroimage.2013.05.033
- 452 Barch, D.M., Yarkoni, T., 2013. Introduction to the special issue on reliability and  
453 replication in cognitive and affective neuroscience research. *Cogn. Affect. Behav.*  
454 *Neurosci.* 13, 687–689. doi:10.3758/s13415-013-0201-7
- 455 Cattell, R.B., 1963. Theory of fluid and crystallized intelligence: A critical experiment. *J.*  
456 *Educ. Psychol.* 54, 1–22. doi:10.1037/h0046743
- 457 Cole, M.W., Bassett, D.S., Power, J.D., Braver, T.S., Petersen, S.E., 2014. Intrinsic and  
458 task-evoked network architectures of the human brain. *Neuron* 83, 238–251.  
459 doi:10.1016/j.neuron.2014.05.014
- 460 Cole, M.W., Ito, T., Bassett, D.S., Schultz, D.H., 2016. Activity flow over resting-state  
461 networks shapes cognitive task activations. *Nat. Neurosci.* 19, 1718–1726.  
462 doi:10.1101/055194
- 463 Colom, R., Karama, S., Jung, R.E., Haier, R.J., 2010. Human intelligence and brain  
464 networks. *Dialogues Clin. Neurosci.* 12, 489–501.
- 465 Dubois, J., Adolphs, R., 2016. Building a Science of Individual Differences from fMRI.  
466 *Trends Cogn. Sci.* 20, 1–19. doi:10.1016/j.tics.2016.03.014
- 467 Finn, E.S., Shen, X., Scheinost, D., Rosenberg, M.D., Huang, J., Chun, M.M.,  
468 Papademetris, X., Todd Constable, R., 2015. Functional connectome fingerprinting:  
469 identifying individuals using patterns of brain connectivity. *Nat. Neurosci.* 18, 1–11.  
470 doi:10.1038/nn.4135
- 471 Fox, M.D., Greicius, M., 2010. Clinical applications of resting state functional  
472 connectivity. *Front. Syst. Neurosci.* 4, 19. doi:10.3389/fnsys.2010.00019
- 473 Geerligs, L., Rubinov, M., Cam-CAN, Henson, R.N., 2015. State and Trait Components of

- 474 Functional Connectivity: Individual Differences Vary with Mental State. *J. Neurosci.*  
475 35, 13949–13961. doi:10.1523/JNEUROSCI.1324-15.2015
- 476 Glasser, M.F., Sotiropoulos, S.N., Wilson, J.A., Coalson, T.S., Fischl, B., Andersson, J.L.,  
477 Xu, J., Jbabdi, S., Webster, M., Polimeni, J.R., Van Essen, D.C., Jenkinson, M., 2013.  
478 The minimal preprocessing pipelines for the Human Connectome Project. *Neuroimage*  
479 80, 105–124. doi:10.1016/j.neuroimage.2013.04.127
- 480 Gottfredson, L.S., 1997. Why g matters: The complexity of everyday life. *Intelligence* 24,  
481 79–132. doi:10.1016/S0160-2896(97)90014-3
- 482 Haier, R.J., Colom, R., Schroeder, D.H., Condon, C.A., Tang, C., Eaves, E., Head, K.,  
483 2009. Gray matter and intelligence factors: Is there a neuro-g? *Intelligence* 37, 136–  
484 144. doi:10.1016/j.intell.2008.10.011
- 485 Hotelling, H., 1936. Relations between two sets of variates. *Biometrika* 28, 321–377.
- 486 Kettenring, J.R., 1971. Canonical Analysis of Several Sets of Variables. *Biometrika* 58,  
487 433–451.
- 488 Lerman-Sinkoff, D.B., Sui, J., Rachakonda, S., Kandala, S., Calhoun, V.D., Barch, D.M.,  
489 2017. Multimodal neural correlates of cognitive control in the Human Connectome  
490 Project. *Neuroimage*. doi:10.1016/j.neuroimage.2017.08.081
- 491 Modi, S., Kumar, M., Kumar, P., Khushu, S., 2015. Aberrant functional connectivity of  
492 resting state networks associated with trait anxiety. *Psychiatry Res. - Neuroimaging*  
493 234, 25–34. doi:10.1016/j.psychres.2015.07.006
- 494 Power, J.D., Barnes, K. a, Snyder, A.Z., Schlaggar, B.L., Petersen, S.E., 2012. Spurious but  
495 systematic correlations in functional connectivity MRI networks arise from subject  
496 motion. *Neuroimage* 59, 2142–54. doi:10.1016/j.neuroimage.2011.10.018
- 497 Raichle, M.E., 2015. The Brain’s Default Mode Network. *Annu. Rev. Neurosci.* 38, 433–  
498 447. doi:10.1146/annurev-neuro-071013-014030
- 499 Rosenberg, M.D., Finn, E.S., Scheinost, D., Papademetris, X., Shen, X., Constable, R.T.,  
500 Chun, M.M., 2016. A neuromarker of sustained attention from whole-brain functional  
501 connectivity. *Nat. Neurosci.* 19, 165–71. doi:10.1038/nn.4179
- 502 Schultz, D.H., Cole, M.W., 2016. Higher Intelligence Is Associated with Less Task-Related  
503 Brain Network Reconfiguration. *J. Neurosci.* 36, 8551–8561.

- 504 doi:10.1523/JNEUROSCI.0358-16.2016
- 505 Smith, S.M., Nichols, T.E., Vidaurre, D., Winkler, A.M., J Behrens, T.E., Glasser, M.F.,  
506 Ugurbil, K., Barch, D.M., Van Essen, D.C., Miller, K.L., 2015. A positive-negative  
507 mode of population covariation links brain connectivity, demographics and behavior.  
508 *Nat. Neurosci.* 18, 1–7. doi:10.1038/nn.4125
- 509 Smith, S.M., Vidaurre, D., Beckmann, C.F., Glasser, M.F., Jenkinson, M., Miller, K.L.,  
510 Nichols, T.E., Robinson, E.C., Salimi-Khorshidi, G., Woolrich, M.W., Barch, D.M.,  
511 Ugurbil, K., Van Essen, D.C., 2013. Functional connectomics from resting-state fMRI.  
512 *Trends Cogn. Sci.* 17, 666–82. doi:10.1016/j.tics.2013.09.016
- 513 Takagi, Y., Sakai, Y., Abe, Y., Nishida, S., Harrison, B.J., Martínez-Zalacaín, I., Soriano-  
514 Mas, C., Narumoto, J., Tanaka, S.C., 2018. A common brain network among state,  
515 trait, and pathological anxiety from whole-brain functional connectivity. *Neuroimage*  
516 172, 506–516. doi:10.1016/j.neuroimage.2018.01.080
- 517 Takagi, Y., Sakai, Y., Lisi, G., Yahata, N., Abe, Y., Nishida, S., Nakamae, T., Morimoto,  
518 J., Kawato, M., Narumoto, J., Tanaka, S.C., 2017. A neural marker of obsessive-  
519 compulsive disorder from whole-brain functional connectivity. *Sci. Rep.* 7, 7538.
- 520 Tavor, I., Parker Jones, O., Mars, R.B., Smith, S.M., Behrens, T.E., Jbabdi, S., 2016. Task-  
521 free MRI predicts individual differences in brain activity during task performance.  
522 *Science* 352, 216–20. doi:10.1126/science.aad8127
- 523 Ugurbil, K., Xu, J., Auerbach, E.J., Moeller, S., Vu, A.T., Duarte-Carvajalino, J.M.,  
524 Lenglet, C., Wu, X., Schmitter, S., Van de Moortele, P.F., Strupp, J., Sapiro, G., De  
525 Martino, F., Wang, D., Harel, N., Garwood, M., Chen, L., Feinberg, D.A., Smith,  
526 S.M., Miller, K.L., Sotiropoulos, S.N., Jbabdi, S., Andersson, J.L.R., Behrens, T.E.J.,  
527 Glasser, M.F., Van Essen, D.C., Yacoub, E., 2013. Pushing spatial and temporal  
528 resolution for functional and diffusion MRI in the Human Connectome Project.  
529 *Neuroimage* 80, 80–104. doi:10.1016/j.neuroimage.2013.05.012
- 530 Van Essen, D.C., Ugurbil, K., Auerbach, E., Barch, D., Behrens, T.E.J., Bucholz, R.,  
531 Chang, A., Chen, L., Corbetta, M., Curtiss, S.W., Della Penna, S., Feinberg, D.,  
532 Glasser, M.F., Harel, N., Heath, A.C., Larson-Prior, L., Marcus, D., Michalareas, G.,  
533 Moeller, S., Oostenveld, R., Petersen, S.E., Prior, F., Schlaggar, B.L., Smith, S.M.,

- 534 Snyder, A.Z., Xu, J., Yacoub, E., 2012. The Human Connectome Project: A data  
535 acquisition perspective. *Neuroimage* 62, 2222–2231.  
536 doi:10.1016/j.neuroimage.2012.02.018
- 537 Via, J., Santamaria, I., Pérez, J., 2005. Canonical correlation analysis (CCA) algorithms for  
538 multiple data sets: Application to blind SIMO equalization. *Signal Process. Conf.* 1,  
539 4–7.
- 540 Vía, J., Santamaría, I., Pérez, J., 2007. A learning algorithm for adaptive canonical  
541 correlation analysis of several data sets. *Neural Networks* 20, 139–152.  
542 doi:10.1016/j.neunet.2006.09.011  
543
